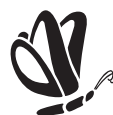

## Reviewers for *Environmental Entomology* (November 2020–October 2021)

The Editors-in-Chief and the Subject Editors of *Environmental Entomology* thank the following scientists for their voluntary commitment of valuable professional time and expertise to peer reviewing manuscripts submitted for publication in our journal. The quality and scientific stature of the journal depends on the conscientious efforts of these individuals.

### Top Reviewers (3+ reviews completed)

|                              |                  |                 |                |
|------------------------------|------------------|-----------------|----------------|
| Alyokhin, Andrei             | Haan, Nathan L.  | Mankin, Richard | Seal, Dakshina |
| Bodino, Nicola               | Havill, Nathan   | Mauck, Kerry    | Short, Clancy  |
| Brent, Colin                 | Isaacs, Rufus    | Meagher, Robert | Wilson, Blake  |
| Del Pozo-Valdivia, Alejandro | Kansman, Jessica | Nixon, Laura    | Wiman, Nik     |
| Elkinton, Joe                | Kennedy, George  | Obrycki, John   | Yuma, Masahide |
| Gotoh, Tetsuo                | Koch, Jonathan   | Raine, Nigel    |                |
| Gui, Lianyou                 | Krey, Karol      | Rice, Kevin     |                |

### Reviewers

|                            |                    |                           |                              |
|----------------------------|--------------------|---------------------------|------------------------------|
| Aardema, Matthew           | Bernard, Jared     | Chong, Juang-Horng        | Escobar-Bravo, Rocio         |
| Abney, Mark                | Bernardi, Oderlei  | Chouvenc, Thomas          | Esfandiari, Mehdi            |
| Abraham, John              | Bertone, Matt      | Christenson, Lynn         | Espino, Luis                 |
| Acosta, Ximena             | Beuzelin, Julien   | Chuang, Wen-Po            | Esquivel, Jesus F.           |
| Adalsteinsson, Solny       | Blaauw, Brett      | Clark, Robert             | Ethington, Matthew           |
| Adams, Christopher         | Bloom, Elias       | Clarke, Stephen           | Evenden, Maya                |
| Addesso, Karla             | Blossey, Bernd     | Cockrell, Darren          | Farfan, Monica               |
| Adler, Peter               | Blubaugh, Carmen   | Cook, Stephen             | Feldman, Max                 |
| Agnello, Arthur            | Bowers, Deane      | Cordeiro, Guaraci         | Ferla, Noeli Juarez          |
| Ahamed, Golam Jalal        | Bowsher, Julia     | Correa, Alberto           | Fernandez, Fernando          |
| Ajayi, Olufemi             | Bradshaw, Jeffrey  | Correa, César             | Fleischer, Shelby            |
| Alcalá Herrera, Rafael     | Braman, S.         | Cottrell, Ted             | Furlong, Michael             |
| Ali, Md                    | Brantley, Steven   | Cranshaw, Whitney         | Galbraith, Sara              |
| Allison, Jeremy            | Breed, Greg        | Crook, Damon              | Gamez, Manuel                |
| Aluja, Martin              | Britt, Kadie       | D'Ambrosio, Damon         | Gantier, Jean-Charles        |
| Aman, Bonaventure          | Brust, Gerald      | Daane, Kent               | Gantz, Jd                    |
| Angelella, Gina            | Burrack, Hannah    | Damos, Petros             | Gao, Yulin                   |
| Arce, Andres               | Bush, Samantha     | Dapporto, Leonardo        | García-Díaz, Esmeralda       |
| Arenas, Paola              | Byers, John        | Daugherty, Matt           | Garcia, Flávio               |
| Arthurs, Steven            | Calderwood, Lily   | Davis, Abby               | Garnas, Jeff                 |
| Asam Riaz, Muhammad        | Cammack, Jonathan  | Davis, Jeffrey            | Ge, Xuezheng                 |
| Athanassiou, Christos      | Campbell, Kaitlin  | De Freitas Bueno, Adeney  | Geden, Christopher           |
| Atkinson, Thomas           | Canassa, Vinícius  | Debano, Sandy             | Gerken, Alison               |
| Avanesyan, Alina           | Cao, Yu            | Diaz-Fleischer, Francisco | Ghesini, Silvia              |
| Avtzis, Dimitris           | Cha-Um, Suriyan    | Diepenbrock, Lauren       | Gill, Richard                |
| Babin, Régis               | Cha, Dong H.       | Difonzo, Christina        | Ginzler, Matthew             |
| Ban, Liping                | Chanchala, Gayani  | Digennaro, Peter          | Golec, Julian                |
| Banaskaz-Cibicka, Weronika | Chandler, Jennifer | Ditomaso, Antonio         | Goolsby, John                |
| Banfield-Zanin, Jennifer   | Chari, Lenin       | Dodds, Kevin              | Grab, Heather                |
| Bauer, Christian           | Chen, Jian         | Draney, Michael           | Graham, Kelsey               |
| Bennett, Gordon            | Chen, Xiaosheng    | Drummond, Francis         | Greyson-Gaito, Christopher   |
| Bento, J. M. S.            | Cherry, Ronald     | Edi, Malo                 | Griffith, Michael            |
| Beres, Brian               | Chitturi, Anitha   | Emery, Sara               | Grossenbacher, Grossenbacher |

- Guedot, Christelle  
 Gutierrez-Coarite, Rosemary  
 Hagler, James  
 Hagstrum, David  
 Hajek, Ann  
 Hanson, Anthony  
 Harrington, Thomas C.  
 Hartshorn, Jess  
 Hayes, Richard  
 Hellmich, Richard  
 Hemberger, Jeremy  
 Henry, Erica  
 Heong, Kong Luen  
 Hidalgo, Sergio  
 Hoback, William  
 Hochkirch, Axel  
 Holway, David  
 Hoover, Kelli  
 Horgan, F. G.  
 Hunt, Thomas  
 Hutchison, William  
 Inouye, David W.  
 Iuliano, Ben  
 Izadi, Hamzeh  
 Jesus, Flávio  
 Johnson, Reed  
 Jones, Iwan  
 Joshi, Neelendra  
 Jung, Chuleui  
 Kanzaki, Natsumi  
 Kaplan, Ian  
 Karban, Richard  
 Karimi-Malati, Azadeh  
 Kaur, Rabinder  
 Kavallieratos, Nickolas  
 Kenis, Marc  
 Kheirodin, Arash  
 Kirkpatrick, Danielle  
 Kishi, Shigeki  
 Knight, Alan L.  
 Košťál, Vladimír  
 Kozel, Petr  
 Kpindou, Douro  
 Kral-O'Brien, Katherine  
 Kruger, Alexandra  
 Kuhar, Thomas  
 Lackey, Alycia  
 Lahiri, Sriyanka  
 Lall, Abner  
 Lasa, Rodrigo  
 Law, Jeffrey  
 Lecroy, Kathryn  
 Lee, Doo-Hyung  
 Lee, Jana  
 Lee, Kyeong-Yeoll  
 Lehmann, Philipp  
 Leslie, Timothy  
 Liu, Houping  
 Lopez-Urbe, Margarita  
 Lopez, Lorena  
 Lynch, Shannon Colleen
- Machtlinger, Erika  
 Maistrello, Lara  
 Malaquias, Jose'  
 Mantilla, Juan  
 Marchioro, Cesar  
 Marcos-Garcia, Maria  
 Marshall, Jordan  
 Martel, Veronique  
 Martinson, Holly  
 Mason, Linda  
 Matteson, Kevin  
 Mayfield, Albert  
 Mccabe, Lindsie  
 Mccauley, Shannon  
 Mcmanus, Michael  
 Meier, Amanda  
 Mercader, Rodrigo  
 Meyer-Rochow, Victor  
 Milbrath, Lindsey  
 Miller, Daniel R.  
 Milosavljevic, Ivan  
 Minter, Carey  
 Mitchell, Paula  
 Morandin, Lora  
 Morente, Marina  
 Nachappa, Punya  
 Nadel, Hannah  
 Nansen, Christian  
 Nascimento, Fabio  
 Natasha Mothapo, Palesa  
 Nault, Brian  
 Nava, Dori  
 Nedvěd, Oldřich  
 Nelson, Lori  
 Neven, Lisa  
 Niemela, Jari  
 Nottingham, Louis  
 O'Neal, Matthew  
 Oi, David  
 Onufrieva, Ksenia  
 Orpet, Robert  
 Osawa, Takeshi  
 Owens, Avalon  
 Ozman-Sullivan, Sebahat  
 Park, Mia  
 Park, Yong-Lak  
 Parker, Joel  
 Parra, José  
 Parreno, Alejandra  
 Parry, Dylan  
 Parys, Katherine  
 Peirce, Erika  
 Pérez-Alquicira, Jessica  
 Perry, Kayla  
 Peterson, Steve  
 Pfeiffer, Douglas  
 Pineda, Samuel  
 Portilla, Maribel  
 Portman, Zachary  
 Powell, Jim  
 Prager, Sean
- Prasad, Renee  
 Prasifka, Jarrad  
 Prischmann-Voldseth, Deirdre  
 Quesada, Enrique  
 Quinn, Nicole  
 Ramasamy, Srinivasan  
 Ranger, Christopher  
 Rassati, Davide  
 Ray, Ann  
 Raymond, Ben  
 Recart, Wilnelia  
 Reding, Michael  
 Reineke, Annette  
 Reisig, Dominic  
 Reitz, Stuart  
 Renkema, Justin  
 Reznik, Sergey Ya.  
 Riggins, John  
 Riudavets, Jordi  
 Rizwan, Muhammad  
 Roberts, Kevin  
 Roberts, Phillip  
 Rodriguez-Saona, Cesar  
 Roeder, Karl  
 Romero-López, Angel  
 Rosenheim, Jay  
 Ross, Darrell  
 Roulston, T'Ai  
 Roy, Kusal  
 Royer, Tom  
 Saguez, Julien  
 Sahragard, Ahad  
 Salas, Bacilio  
 Salom, Scott  
 Sanborn, Allen  
 Sartori Guidolin, Aline  
 Savoldelli, Sara  
 Schmidt-Jeffris, Rebecca  
 Schmidt, Jason  
 Sciarretta, A.  
 Seehausen, Martin  
 Serrano, Jacqueline  
 Setamou, Mamoudou  
 Sethuraman, Arun  
 Shao, Prof. Yongqi  
 Shi, Peijian  
 Siderhurst, Matthew  
 Silveira, Orlando  
 Sitrine, Rob  
 Sisterson, Mark  
 Sivakoff, Frances  
 Skuhrovec, Jiri  
 Slusher, Eddie  
 Smith, Lincoln  
 Snyder, William  
 Soundararajan, Rp  
 Spears, Lori  
 Stockton, Dara  
 Stout, Michael  
 Strangi, Agostino  
 Su, Nan-Yao
- Sullivan, Brian  
 Sullivan, Gregory  
 Suzuki, Takeshi  
 Swisher Grimm, Kylie  
 Szczepaniec, Ada  
 Szendrei, Zsofia  
 Tafoya, Felipe  
 Tamborindéguy, Cecilia  
 Tariq, Muhammad  
 Teulon, David  
 Theron, Charmaine  
 Tinghitella, Robin  
 Tiwari, Sundar  
 Toews, Michael  
 Toledo, Pedro  
 Torres, Jorge  
 Toth, Zoltan  
 Toxopeus, Jantina  
 Trivellone, Valeria  
 Trotter, Talbot  
 Trumbo, Stephen  
 Uchida, Noriko  
 Ullah, Mohammad Shaef  
 Ulyshen, Michael Ulyshen  
 Urban, Julie  
 Urbaneja-Bernat, Pablo  
 Vail, Karen  
 Van Den Berg, Johnnie  
 Van Dis, Natalie  
 Van Meyel, Sophie  
 Vanweelden, Matthew  
 Vaughan, Mace  
 Vilcinskas, Andreas  
 Vyavhare, Suhas  
 Waite, Evan  
 Wallingford, Anna  
 Wang, Chengshu  
 Wang, Ran  
 Wang, Su  
 Wang, Xingeng  
 Wang, Zinan  
 Ward, Samantha  
 Waters, Timothy  
 Weaver, David  
 Weber, Donald  
 Weber, Marjorie  
 Wei, Zhao-Jun  
 Weidner, Lauren  
 Weihrauch, Florian  
 Weintraub, Phyllis  
 Wenninger, Erik  
 Wiggins, Greg  
 Williams, Scott  
 Wimp, Gina  
 Wu, Shaohui  
 Yamamoto, Pedro  
 Yamanaka, Takehiko  
 Yee, Wee  
 Zalucki, Myron  
 Zhang, Aihuan  
 Zhu, Chaodong
